# Supplementary material for: Ligand binding modes from low resolution GPCR models and mutagenesis: chicken bitter taste receptor as a test-case
Source: PubMed Central journal article supplement (PMC5557796; doi:10.1038/s41598-017-08344-9), 2017-08-15
Supplement: 41598_2017_8344_MOESM1_ESM.pdf [file 41598_2017_8344_MOESM1_ESM.pdf]

## Supplementary Information

### Ligand binding modes from low resolution GPCR models and mutagenesis: chicken bitter taste receptor as a test-case

Antonella Di Pizio, Louisa-Marie Kruetzfeldt, Shira Cheled-Shoval, Wolfgang Meyerhof, Maik Behrens and Masha Y. Niv

**Supplementary Figure S1: ggTas2r1 homology models and their templates.** Hydrophobic (orange) and hydrophilic (light cyan) surfaces of  $\beta$ 2AR crystal structure (A), ggTas2r1 model 1 (B), M2R crystal structure (C), and ggTas2r1 model 2 (D).

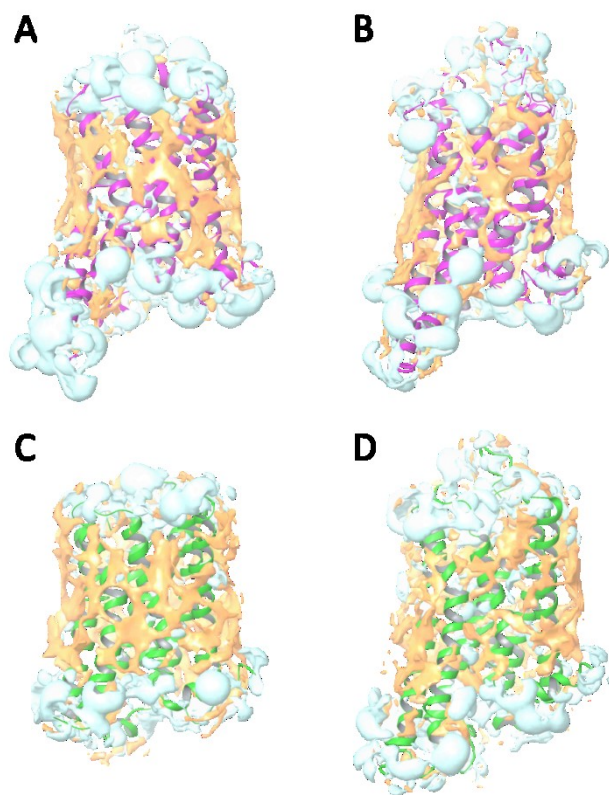

**Supplementary Figure S2: ggTas2r1 homology models.** ggTas2r1 model 1 (A) is colored in magenta, ggTas2r1 model 2 (B) in green. Binding pocket surfaces of model 1 and model 2 are highlighted in yellow.

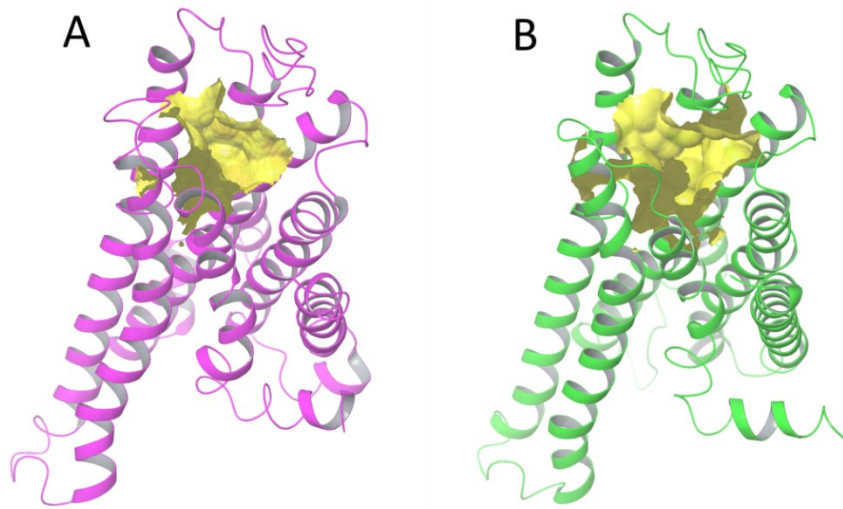

**Supplementary Figure S3: a) Docking poses of quinine/model 1 (magenta) and b) quinine/model 2 (green).** H-bond interactions are shown as green dotted lines.

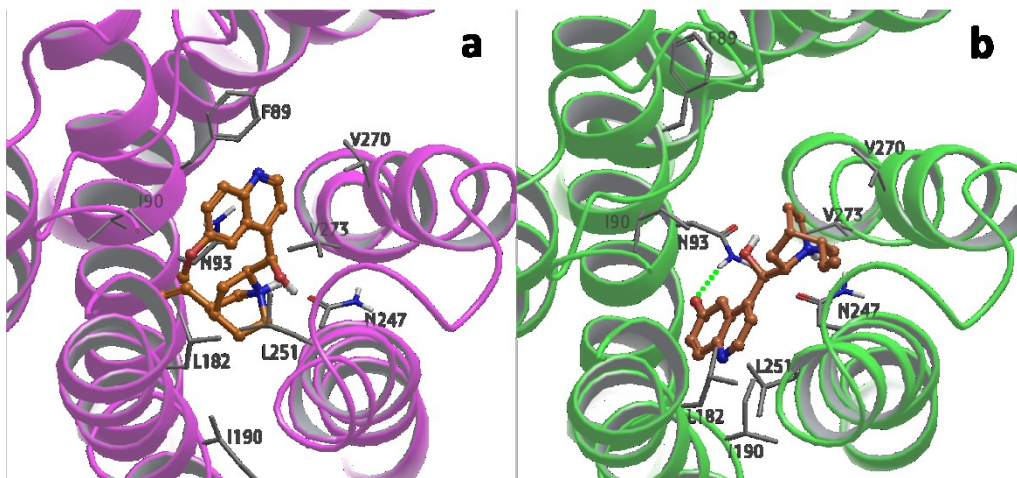

**Supplementary Figure S4: Superimposition of quinine/model 1 and quinine/model 2 binding modes obtained after PELE simulations.** In the picture we show the representative structures obtained after clustering. Model 1 (magenta) and model 2 (green) receptor structures are shown as transparent cartoon. Panels a and b show the binding modes of two representative quinine/model 1 and quinine/model 2 complexes after PELE simulations superimposed with those of unrefined quinine/model 1 and quinine/model 2 complexes (in black).

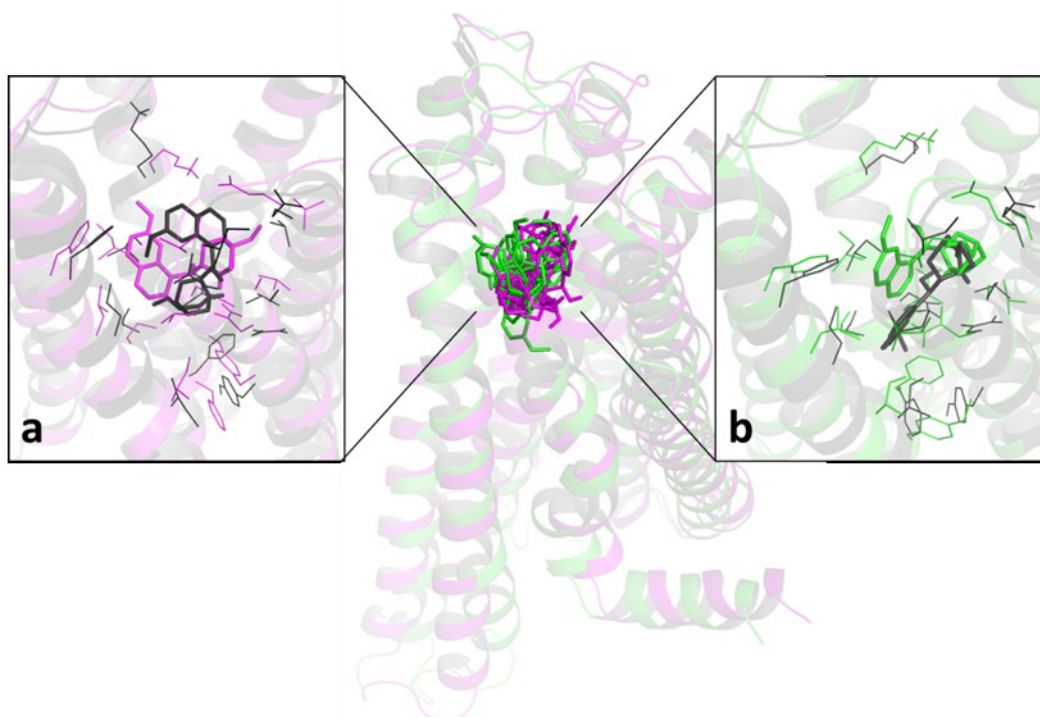

**Supplementary Figure S5: Superimposition of all analyzed complexes of ggTas2r1 with its agonists:** quinine (magenta), diphenidramine (yellow), diphenidol (cyan), chlorpheniramine (violet), chloramphenicol (orange), chloroquine (green), coumarin (red).

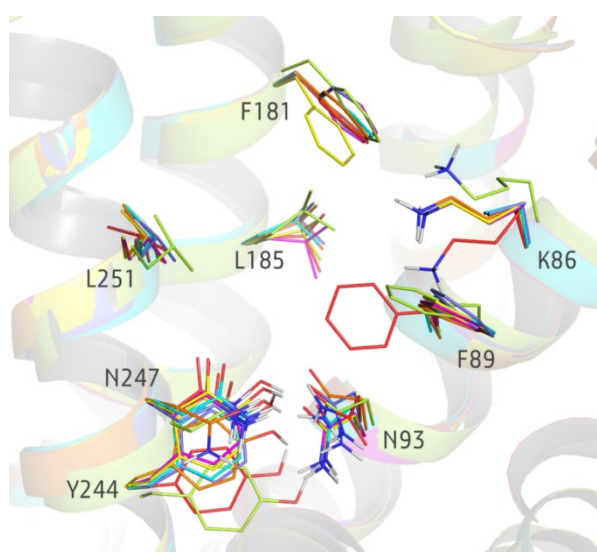

**Supplementary Table S1: SiteMap descriptors calculated for ggTas2r1 model1**

| MODEL 1 | H-bond acceptor Area (Å <sup>2</sup> ) | H-bond donor Area (Å <sup>2</sup> ) | Hydrophilic Area (Å <sup>2</sup> ) | Hydrophobic Area (Å <sup>2</sup> ) | Surface (Å <sup>2</sup> ) |
|---------|----------------------------------------|-------------------------------------|------------------------------------|------------------------------------|---------------------------|
| pose 1  | 114.5                                  | 352.4                               | 448.1                              | 310.1                              | 870.1                     |
| pose 2  | 116                                    | 402.8                               | 489.3                              | 563.9                              | 1350.9                    |
| pose 3  | 48.9                                   | 253.6                               | 302.1                              | 535.9                              | 1031.2                    |
| pose 4  | 69.3                                   | 186.5                               | 251.8                              | 425.6                              | 760                       |
| pose 5  | 62.3                                   | 304.9                               | 357.7                              | 536.3                              | 1103.7                    |
| pose 6  | 83.4                                   | 294.3                               | 373.7                              | 465.7                              | 1025.6                    |
| pose 7  | 90.8                                   | 295.4                               | 340.9                              | 693.5                              | 1202.7                    |
| average | <b>83.6</b>                            | <b>298.5</b>                        | <b>370.8</b>                       | <b>502.1</b>                       | <b>1051.2</b>             |
| st.dv   | 23.6                                   | 63.7                                | 74.7                               | 107.4                              | 184.7                     |

**Supplementary Table S2: SiteMap descriptors calculated for ggTas2r1 model2**

| MODEL 2 | H-bond acceptor Area (Å <sup>2</sup> ) | H-bond donor Area (Å <sup>2</sup> ) | Hydrophilic Area (Å <sup>2</sup> ) | Hydrophobic Area (Å <sup>2</sup> ) | Surface (Å <sup>2</sup> ) |
|---------|----------------------------------------|-------------------------------------|------------------------------------|------------------------------------|---------------------------|
| pose 1  | 53.6                                   | 259                                 | 305.4                              | 452.6                              | 854.7                     |
| pose 2  | 93.1                                   | 332.2                               | 428.3                              | 647.9                              | 1387                      |
| pose 3  | 82.6                                   | 215                                 | 278.3                              | 400.1                              | 713.1                     |
| pose 4  | 84.4                                   | 161.6                               | 253                                | 453.8                              | 1001.2                    |
| pose 5  | 58.2                                   | 256.2                               | 314                                | 476.7                              | 978.7                     |
| average | <b>74.4</b>                            | <b>244.8</b>                        | <b>315.8</b>                       | <b>486.2</b>                       | <b>986.9</b>              |
| st.dv.  | 15.6                                   | 56.2                                | 60.2                               | 84.6                               | 224.8                     |

**Supplementary Table 3: Name and SMILES codes of small molecules analyzed by both computational and experimental investigations in this paper**

| Name                                                 | SMILES                                                                              |
|------------------------------------------------------|-------------------------------------------------------------------------------------|
| quinine                                              | <chem>COc(c1)ccc(c12)nccc2[C@@H](O)[C@H](C[C@@H]34)[N@H+](CC3)C[C@@H]4C=C</chem>    |
| diphenhydramine                                      | <chem>c1ccccc1C(OCC[NH+](C)C)c2ccccc2</chem>                                        |
| chlorpheniramine                                     | <chem>c1cc(Cl)ccc1[C@H](CC[NH+](C)C)c2ncccc2</chem>                                 |
| diphenidol                                           | <chem>c1ccccc1C(O)(c2ccccc2)CCC[NH+]3CCCCC3</chem>                                  |
| chloramphenicol                                      | <chem>ClC(Cl)C(=O)N[C@H](CO)[C@H](O)c1ccc([NH+](O)O)cc1</chem>                      |
| chloroquine                                          | <chem>c1cc(Cl)cc(c12)nccc2N[C@@H](C)CCC[NH+](CC)CC</chem>                           |
| coumarin                                             | <chem>c1cc(=O)oc(c12)cccc2</chem>                                                   |
| (8α,9S)-6'-Methoxycinchonan-9-amine trihydrochloride | <chem>COc(c1)ccc(c12)nccc2[C@@H](N)[C@@H]([N@@H+]34)C[C@@H](CC4)[C@H](C3)C=C</chem> |
| epiquinidine                                         | <chem>C=C[C@@H](C[N@H+]12)[C@@H](CC1)C[C@@H]2[C@H](O)c(ccn3)c(c34)cc(cc4)OC</chem>  |
| ethylhydrocupreine                                   | <chem>CCOc(cc1)cc(c12)c(ccn2)[C@@H](O)[C@H](C[C@@H]34)[N@@H+](CC3)C[C@@H]4CC</chem> |
| quinidine                                            | <chem>C=C[C@@H](C[N@@H+]12)[C@H](CC1)C[C@@H]2[C@@H](O)c(ccn3)c(c34)cc(cc4)OC</chem> |

**Supplementary Table 4: Receptor activating concentrations of the analyzed molecules**

| Substance                                                     | ggTas2r1 | K86A | F89A | N93A | F181A | L185A | Y244A | N247A | L251A |
|---------------------------------------------------------------|----------|------|------|------|-------|-------|-------|-------|-------|
| quinine                                                       | 10       | 10   | 3    | 30   | 30    | 30    | 10    | 10    | 10    |
| diphenhydramine                                               | 10       | 10   | -    | -    | -     | -     | -     | -     | -     |
| diphenidol                                                    | 10       | 30   | 100  | -    | 30    | 30    | 30    | 30    | 30    |
| chlorpheniramine                                              | 10       | 10   | 100  | 100  | 10    | 30    | 30    | 30    | 30    |
| chloramphenicol                                               | 10       | 30   | 100  | 30   | 10    | 10    | 10    | 10    | 10    |
| chloroquine                                                   | 10       | 30   | 300  | 100  | 100   | 10    | 30    | 30    | 30    |
| coumarin                                                      | -        | 300  | -    | -    | -     | -     | 300   | -     | -     |
| quinidine                                                     | 1        |      |      |      |       |       |       |       |       |
| epiquinidine                                                  | 30       |      |      |      |       |       |       |       |       |
| ethylhydrocupreine                                            | 30       |      |      |      |       |       |       |       |       |
| (8 $\alpha$ ,9S)-6'-Methoxycinchonan-9-amine trihydrochloride | -        |      |      |      |       |       |       |       |       |

all lowest receptor activating concentrations (=thresholds) in  $\mu$ M

**Supplementary Appendix 1: Analysis of ggTas2r1 binding site obtained by modeling the structure using the newly crystallized  $\mu$ -opioid (5C1M.pdb) and adenosine A2A (5G53.pdb) receptors as templates**

Newly crystallized structures in full active conformation, such as adenosine A2A (5G53.pdb) and  $\mu$ -opioid receptor (5C1M.pdb), were released during the course of this study (on August 2016 and August 2015, respectively).

Below we report the sequence similarity of the binding site of ggTas2r1 compared with the templates used in this work (4MQS.pdb and 2SN6.pdb) and the newly released X-ray structures (5G53.pdb and 5C1M.pdb).

|          |                            |      |
|----------|----------------------------|------|
| ggTas2r1 | FKFINSSKRILLCGITTYNFLEVVA  | 100% |
| 4MQS     | YLDYSNWYIFFFGIAYAWYNVWYCY  | 20%  |
| 3SN6     | GTDVVTSDFFTYASSSFWFENYNGY  | 24%  |
| 5G53     | AAVLTQGLFEDYFFAYAWLHNMISH  | 12%  |
| 5C1M     | QIDYMEFGFSPTICIFYAWIHVVFAL | 16%  |

As we may see from the figure above, the similarity of ggTas2r1 with all available templates is very low. The SiteMap descriptors of the binding pockets obtained with 5G53-based and 5C1M-based models are reported below:

|                                         | 5G53-based model | 5C1M-based model |
|-----------------------------------------|------------------|------------------|
| H-bond acceptor Area ( $\text{\AA}^2$ ) | 133.5            | 160.7            |
| H-bond donor Area ( $\text{\AA}^2$ )    | 244.2            | 175.2            |
| Hydrophilic Area ( $\text{\AA}^2$ )     | 343.0            | 319.4            |
| Hydrophobic Area ( $\text{\AA}^2$ )     | 377.2            | 407.8            |
| Surface ( $\text{\AA}^2$ )              | 1050.6           | 1038.6           |
